# Supplementary material for: Enhancer–promoter interactions and transcription are largely maintained upon acute loss of CTCF, cohesin, WAPL or YY1
Source: PubMed Central journal article supplement (PMC9729117; doi:10.1038/s41588-022-01223-8), 2022-12-05

ED\_Fig2b\_Anti-ACTB

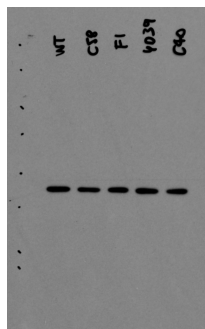

ED\_Fig2b\_Anti-CTCF (reblotted after ACTB antibody)

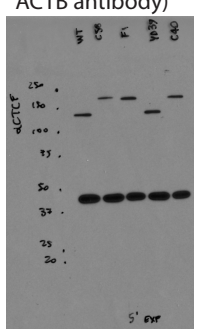

ED\_Fig2b\_Anti-Halo

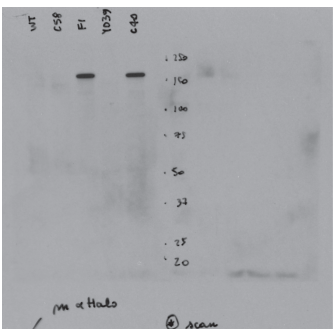

ED\_Fig2b\_anti-V5-RFP

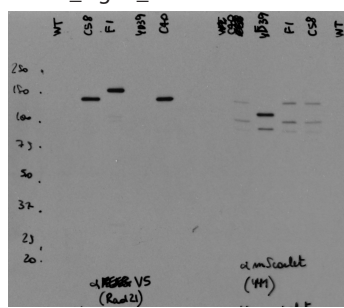

ED\_Fig2b\_Anti-RAD21-YY1-HA

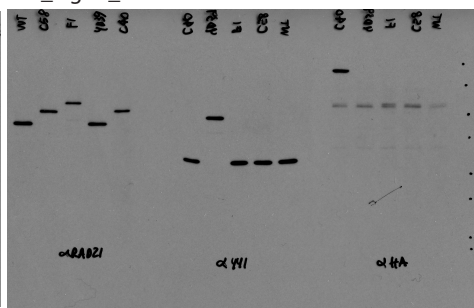

ED\_Fig2b\_Fig2d\_Anti-WAPL

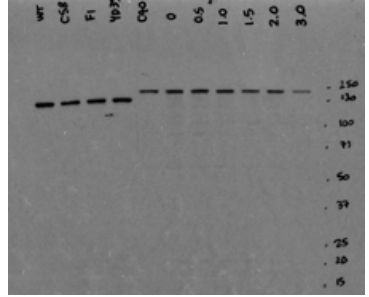

ED\_Fig2d\_Anti-ACTB (reblotted after WAPL antibody)

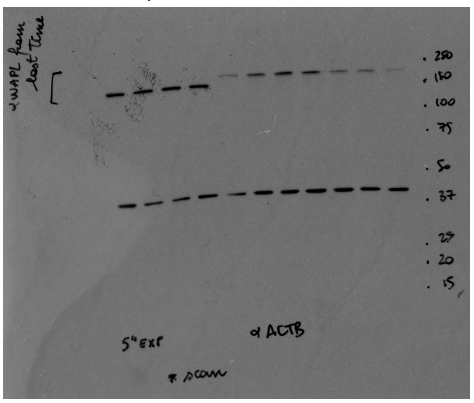

ED\_Fig2f\_ΔCTCF-Anti-CTCF (cut membrane)

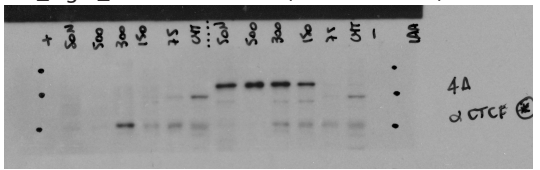

ED\_Fig2f\_ΔCTCF-Anti-H2B (cut membrane)

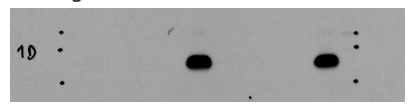

ED\_Fig2f\_ΔCTCF-ΔRAD21\_Anti-RAD21 (cut membrane)

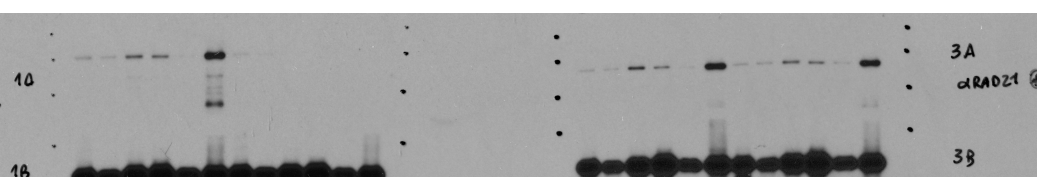

ED\_Fig2f\_ΔRAD21\_Anti-CTCF (cut membrane)

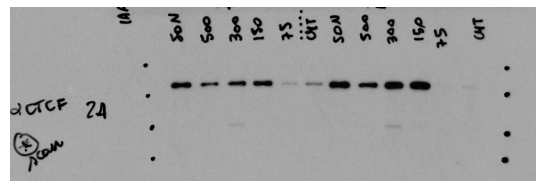

ED\_Fig2f\_ΔCTCF-ΔRAD21\_Anti-WAPL (cut membrane)

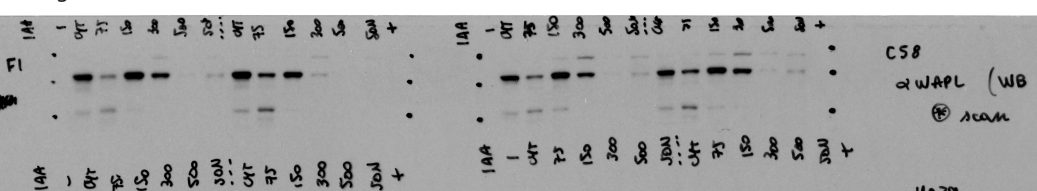

ED\_Fig2f\_ΔRAD21\_Anti-SMC1A (cut membrane)

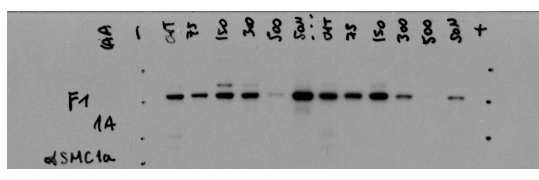

ED\_Fig2f\_ΔRAD21\_Anti-SMC3 (cut membrane)

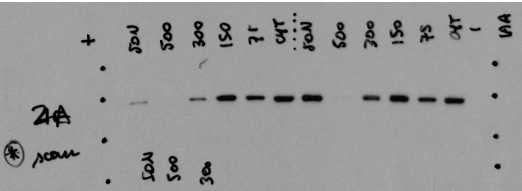

ED\_Fig2f\_ΔWAPL\_Anti-CTCF (cut membrane)

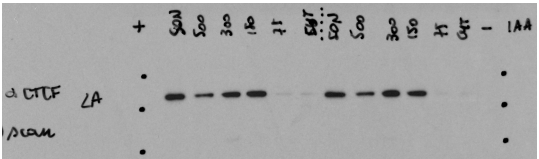

ED\_Fig2f\_ΔWAPL\_Anti-RAD21 (cut membrane)

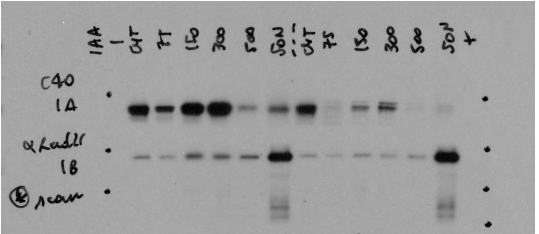

ED\_Fig2f\_ΔWAPL\_Anti-SMC1A (cut membrane)

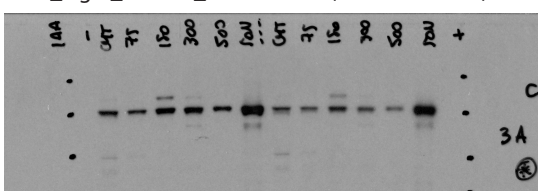

ED\_Fig2f\_ΔWAPL\_Anti-WAPL (cut membrane)

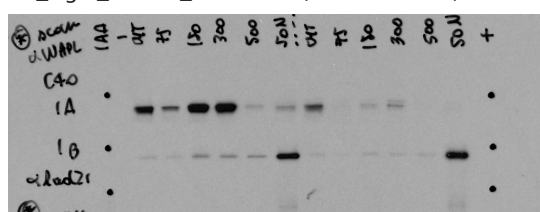

Supplement: 41588_2022_1223_MOESM12_ESM.pdf [file 41588_2022_1223_MOESM12_ESM.pdf]
