# Supplementary material for: Enhancer–promoter interactions and transcription are largely maintained upon acute loss of CTCF, cohesin, WAPL or YY1
Source: PubMed Central journal article supplement (PMC9729117; doi:10.1038/s41588-022-01223-8), 2022-12-05
Supplement: 41588_2022_1223_MOESM2_ESM.pdf [file 41588_2022_1223_MOESM2_ESM.pdf]

## Reporting Summary

Nature Portfolio wishes to improve the reproducibility of the work that we publish. This form provides structure for consistency and transparency in reporting. For further information on Nature Portfolio policies, see our [Editorial Policies](#) and the [Editorial Policy Checklist](#).

### Statistics

For all statistical analyses, confirm that the following items are present in the figure legend, table legend, main text, or Methods section.

n/a Confirmed

- The exact sample size ( $n$ ) for each experimental group/condition, given as a discrete number and unit of measurement
- A statement on whether measurements were taken from distinct samples or whether the same sample was measured repeatedly
- The statistical test(s) used AND whether they are one- or two-sided  
*Only common tests should be described solely by name; describe more complex techniques in the Methods section.*
- A description of all covariates tested
- A description of any assumptions or corrections, such as tests of normality and adjustment for multiple comparisons
- A full description of the statistical parameters including central tendency (e.g. means) or other basic estimates (e.g. regression coefficient) AND variation (e.g. standard deviation) or associated estimates of uncertainty (e.g. confidence intervals)
- For null hypothesis testing, the test statistic (e.g.  $F$ ,  $t$ ,  $r$ ) with confidence intervals, effect sizes, degrees of freedom and  $P$  value noted  
*Give  $P$  values as exact values whenever suitable.*
- For Bayesian analysis, information on the choice of priors and Markov chain Monte Carlo settings
- For hierarchical and complex designs, identification of the appropriate level for tests and full reporting of outcomes
- Estimates of effect sizes (e.g. Cohen's  $d$ , Pearson's  $r$ ), indicating how they were calculated

*Our web collection on [statistics for biologists](#) contains articles on many of the points above.*

### Software and code

Policy information about [availability of computer code](#)

|                 |                                                                                                                                                                                                                                                                                                                                                                                                                                                                                                                                                                                                                                                                                                                                                                                                                                                                                                                                                                                                                                                                                                                                                                                                                                                                                                                                                                                                                                                                                                                                                                                                                                                                                                                                                                                                                                                                                                                                                                                                                                                                                                                                                                                                                                                                                                                                                                                                                                                                                                                                                                                                                                                                                                                                                                                                                                                                                                                                                                                                                                                                                                                                                                                                                                                                                                                                                                                    |
|-----------------|------------------------------------------------------------------------------------------------------------------------------------------------------------------------------------------------------------------------------------------------------------------------------------------------------------------------------------------------------------------------------------------------------------------------------------------------------------------------------------------------------------------------------------------------------------------------------------------------------------------------------------------------------------------------------------------------------------------------------------------------------------------------------------------------------------------------------------------------------------------------------------------------------------------------------------------------------------------------------------------------------------------------------------------------------------------------------------------------------------------------------------------------------------------------------------------------------------------------------------------------------------------------------------------------------------------------------------------------------------------------------------------------------------------------------------------------------------------------------------------------------------------------------------------------------------------------------------------------------------------------------------------------------------------------------------------------------------------------------------------------------------------------------------------------------------------------------------------------------------------------------------------------------------------------------------------------------------------------------------------------------------------------------------------------------------------------------------------------------------------------------------------------------------------------------------------------------------------------------------------------------------------------------------------------------------------------------------------------------------------------------------------------------------------------------------------------------------------------------------------------------------------------------------------------------------------------------------------------------------------------------------------------------------------------------------------------------------------------------------------------------------------------------------------------------------------------------------------------------------------------------------------------------------------------------------------------------------------------------------------------------------------------------------------------------------------------------------------------------------------------------------------------------------------------------------------------------------------------------------------------------------------------------------------------------------------------------------------------------------------------------------|
| Data collection | Nikon NIS-Elements software (v 4.6) for collecting single-molecule imaging<br>Zeiss Zen Blue imaging software (v 3.1) for collecting confocal and Airyscan imaging                                                                                                                                                                                                                                                                                                                                                                                                                                                                                                                                                                                                                                                                                                                                                                                                                                                                                                                                                                                                                                                                                                                                                                                                                                                                                                                                                                                                                                                                                                                                                                                                                                                                                                                                                                                                                                                                                                                                                                                                                                                                                                                                                                                                                                                                                                                                                                                                                                                                                                                                                                                                                                                                                                                                                                                                                                                                                                                                                                                                                                                                                                                                                                                                                 |
| Data analysis   | Sequencing analysis: TrimGalore (v 0.6.5) ( <a href="https://github.com/FelixKrueger/TrimGalore">https://github.com/FelixKrueger/TrimGalore</a> ), Bowtie2 (v 2.3.0) ( <a href="http://bowtie-bio.sourceforge.net/bowtie2/index.shtml">http://bowtie-bio.sourceforge.net/bowtie2/index.shtml</a> ), samtools (v 1.9) ( <a href="http://www.htslib.org/">http://www.htslib.org/</a> ), deepTools (v 2.4.1 & v 3.5.0) ( <a href="https://github.com/deeptools/deepTools">https://github.com/deeptools/deepTools</a> ), MACS (v 2.2.6) ( <a href="https://github.com/macs3-project/MACS">https://github.com/macs3-project/MACS</a> ), MAnorm2 (v 1.0) ( <a href="https://github.com/tushiqi/MAnorm2">https://github.com/tushiqi/MAnorm2</a> ), HiC-Pro (v 2.11.3) ( <a href="https://github.com/nservant/HiC-Pro">https://github.com/nservant/HiC-Pro</a> ), COOLER (v 0.8.10) ( <a href="https://github.com/open2c/cooler">https://github.com/open2c/cooler</a> ), JUICER (v 1.22.01) ( <a href="https://github.com/aidenlab/juicer">https://github.com/aidenlab/juicer</a> ), HiGlass (v 1.11.7) ( <a href="https://github.com/higlass/higlass">https://github.com/higlass/higlass</a> ), cooltools (v 0.3.2) ( <a href="https://github.com/open2c/cooltools">https://github.com/open2c/cooltools</a> ), 3DChromatin_ReplicateQC (v 1.0.1) ( <a href="https://github.com/kundajelab/3DChromatin_ReplicateQC">https://github.com/kundajelab/3DChromatin_ReplicateQC</a> ), coolpuppy (v 0.9.5) ( <a href="https://github.com/open2c/coolpuppy">https://github.com/open2c/coolpuppy</a> ), Mustache (v 1.0.1) ( <a href="https://github.com/ay-lab/mustache">https://github.com/ay-lab/mustache</a> ), chromosight (v 0.9.8) ( <a href="https://github.com/koszullab/chromosight">https://github.com/koszullab/chromosight</a> ), chromHMM (v 1.22) ( <a href="http://compbio.mit.edu/ChromHMM/">http://compbio.mit.edu/ChromHMM/</a> ), Bedtools (v 2.30.0) ( <a href="https://bedtools.readthedocs.io/en/latest/index.html">https://bedtools.readthedocs.io/en/latest/index.html</a> ), kallisto (0.46.2) ( <a href="https://github.com/pachterlab/kallisto">https://github.com/pachterlab/kallisto</a> ), DeSeq2 (v 1.30.1) ( <a href="https://bioconductor.org/packages/release/bioc/html/DESeq2.html">https://bioconductor.org/packages/release/bioc/html/DESeq2.html</a> ), NRSA (v 2.0) ( <a href="http://bioinfo.vanderbilt.edu/NRSA/">http://bioinfo.vanderbilt.edu/NRSA/</a> ), Rsubread (v 1.22.2) ( <a href="https://bioconductor.org/packages/release/bioc/html/Rsubread.html">https://bioconductor.org/packages/release/bioc/html/Rsubread.html</a> )<br>Imaging analysis: ImageJ (v 1.53c) ( <a href="https://imagej.nih.gov/ij/">https://imagej.nih.gov/ij/</a> ), Spot-on (v 1.0.4) ( <a href="https://gitlab.com/tjian-darzacq-lab/spot-on-matlab">https://gitlab.com/tjian-darzacq-lab/spot-on-matlab</a> ), quot (v 3.0) ( <a href="https://github.com/alecheckert/quot">https://github.com/alecheckert/quot</a> ), SASPT (v 1.0) ( <a href="https://github.com/alecheckert/saspt">https://github.com/alecheckert/saspt</a> ), Thunderstorm (v 1.3) ( <a href="https://github.com/zitmen/thunderstorm">https://github.com/zitmen/thunderstorm</a> )<br>Flow cytometry analysis: FlowJo (v 10.3) ( <a href="https://www.flowjo.com/">https://www.flowjo.com/</a> ) |

For manuscripts utilizing custom algorithms or software that are central to the research but not yet described in published literature, software must be made available to editors and reviewers. We strongly encourage code deposition in a community repository (e.g. GitHub). See the Nature Portfolio [guidelines for submitting code & software](#) for further information.

## Data

Policy information about [availability of data](#)

All manuscripts must include a [data availability statement](#). This statement should provide the following information, where applicable:

- Accession codes, unique identifiers, or web links for publicly available datasets
- A description of any restrictions on data availability
- For clinical datasets or third party data, please ensure that the statement adheres to our [policy](#)

The Micro-C, CHIP-seq, nascent RNA-seq and total RNA-seq data generated in this publication are available in NCBI Gene Expression Omnibus through GEO Series accession number GSE178982. We also reanalyzed data that we previously generated in wild type mESCs (GSE130275). spaSPT raw data are accessible through DOI: 10.5281/zenodo.5035837. The reference genome mm10 and sacCer3 are available through UCSC genome browser (<https://hgdownload.soe.ucsc.edu/downloads.html>).

## Human research participants

Policy information about [studies involving human research participants and Sex and Gender in Research](#).

|                             |                                  |
|-----------------------------|----------------------------------|
| Reporting on sex and gender | <input type="text" value="n/a"/> |
| Population characteristics  | <input type="text" value="n/a"/> |
| Recruitment                 | <input type="text" value="n/a"/> |
| Ethics oversight            | <input type="text" value="n/a"/> |

Note that full information on the approval of the study protocol must also be provided in the manuscript.

## Field-specific reporting

Please select the one below that is the best fit for your research. If you are not sure, read the appropriate sections before making your selection.

- Life sciences       Behavioural & social sciences       Ecological, evolutionary & environmental sciences

For a reference copy of the document with all sections, see [nature.com/documents/nr-reporting-summary-flat.pdf](https://nature.com/documents/nr-reporting-summary-flat.pdf)

## Life sciences study design

All studies must disclose on these points even when the disclosure is negative.

|                 |                                                                                                                                                                                                                                                                                                                                                                                                                                                                                                                                                                                                                                                                                                                                                          |
|-----------------|----------------------------------------------------------------------------------------------------------------------------------------------------------------------------------------------------------------------------------------------------------------------------------------------------------------------------------------------------------------------------------------------------------------------------------------------------------------------------------------------------------------------------------------------------------------------------------------------------------------------------------------------------------------------------------------------------------------------------------------------------------|
| Sample size     | 1) Confocal/Airyscan imaging is mainly qualitative. We routinely collected at least six regions of interest (ROIs) with two different cell cultures on two separate days; 2) FRAP: We generally collected data from at least 6 cells per cell line per condition per day, and all presented data are from at least two independent replicates on different days; 3) SPT: We recorded movies for six cells per cell line or condition per day, and all data presented are from at least two independent experiments conducted corresponding to at least 12 cells and at least 100,000 localizations. No statistical method was used to predetermine sample size. We chose the sample size as suggested in the previous report (doi: 10.7554/elife.25776). |
| Data exclusions | 1) FRAP: We excluded data if the bleached spot is not detectable by our algorithm, and if the cell drifted away from the focus during acquisition; 2) SPT: We excluded data if the total localization was lower than 20,000 per cell.                                                                                                                                                                                                                                                                                                                                                                                                                                                                                                                    |
| Replication     | Sequencing data: We generally collected at least 2 biological replicates per condition per day to gain statistical power. For some samples (Micro-C_ΔCTCF_IAA, Micro-C_ΔRAD21_IAA, Micro-C_ΔWAPL_IAA), we performed pilot tests so that the sample sizes will increase to 4. Imaging data: We generally collected at least 2 biological replicates per condition per day. Immunoblotting, biochemical fractionation, flow cytometry experiments were repeated and confirmed at least twice. All attempts at replication were successful.                                                                                                                                                                                                                 |
| Randomization   | Samples were divided into groups based on genomic perturbations. Each auxin-degradation sample is coupled with untreated control.                                                                                                                                                                                                                                                                                                                                                                                                                                                                                                                                                                                                                        |
| Blinding        | The study does not involve therapeutic or animal experiments, so blinding was not necessary. The labeling of samples is also required for all computational analyses.                                                                                                                                                                                                                                                                                                                                                                                                                                                                                                                                                                                    |

## Reporting for specific materials, systems and methods

We require information from authors about some types of materials, experimental systems and methods used in many studies. Here, indicate whether each material, system or method listed is relevant to your study. If you are not sure if a list item applies to your research, read the appropriate section before selecting a response.

## Materials & experimental systems

| n/a                                 | Involved in the study                                     |
|-------------------------------------|-----------------------------------------------------------|
| <input type="checkbox"/>            | <input checked="" type="checkbox"/> Antibodies            |
| <input type="checkbox"/>            | <input checked="" type="checkbox"/> Eukaryotic cell lines |
| <input checked="" type="checkbox"/> | <input type="checkbox"/> Palaeontology and archaeology    |
| <input checked="" type="checkbox"/> | <input type="checkbox"/> Animals and other organisms      |
| <input checked="" type="checkbox"/> | <input type="checkbox"/> Clinical data                    |
| <input checked="" type="checkbox"/> | <input type="checkbox"/> Dual use research of concern     |

## Methods

| n/a                                 | Involved in the study                              |
|-------------------------------------|----------------------------------------------------|
| <input type="checkbox"/>            | <input checked="" type="checkbox"/> ChIP-seq       |
| <input type="checkbox"/>            | <input checked="" type="checkbox"/> Flow cytometry |
| <input checked="" type="checkbox"/> | <input type="checkbox"/> MRI-based neuroimaging    |

## Antibodies

### Antibodies used

anti-CTCF Novus NBP2-52909  
 anti-CTCF EMD 07-729  
 anti-CTCF Abcam ab128873  
 anti-Halo Promega G921A  
 anti-RAD21 EMD 05-908  
 anti-RAD21 Abcam ab154769  
 anti-RAD21 Abcam ab154769  
 anti-V5 ThermoFisher R960-25  
 anti-YY1 Santa Cruz Biotechnology sc-7341  
 anti-YY1 Abcam ab38422  
 anti-YY1 Abcam ab109237  
 anti-YY1 Bethyl Laboratories Inc. A302-778A  
 anti-YY1 Bethyl Laboratories Inc. A302-779A  
 anti-RFP / anti-mScarlet Chromotek 6G6  
 anti-RFP / anti-mScarlet Rockland 600-401-379  
 anti-WAPL Proteintech 16370-1-AP  
 anti-HA Abcam ab9110  
 anti-ACTB Sigma A2228  
 anti-OCT4 Santa Cruz Biotechnology sc-8628  
 anti-TBP abcam ab51841  
 anti-H2B ThermoFisher MA524697  
 anti-SMC1A Bethyl laboratories A300-055A  
 anti-SMC3 Bethyl laboratories A300-060A

### Validation

CTCF, RAD21, WAPL, YY1, HaloTag, V5, HA, RFP antibodies were validated by WB in cells depleted with the corresponding protein. SMC1A and SMC3 were validated by ChIP-seq, which signals are largely overlapped with RAD21. ACTB, TBP, OCT4, and H2B antibodies are well-validated by various studies and manufacturers.

## Eukaryotic cell lines

Policy information about [cell lines and Sex and Gender in Research](#)

### Cell line source(s)

JM8.N4 mESC was obtained from the KOMP Repository at UC Davis.

### Authentication

JM8.N4 mESCs were authenticated by whole-genome sequencing and morphology.

### Mycoplasma contamination

JM8.N4 mESCs were pathogen tested using the IMPACT II test by IDEXX BioResearch (Westbrook, ME). All cells were negative for all pathogens, including Ectromelia, EDIM, LCMV, LDEV, MAV1, MAV2, mCMV, MHV, MNV, MPV, MVM, Mycoplasma pulmonis, Mycoplasma sp., Polyoma, PVM, REO3, Sendai, and TMEV.

### Commonly misidentified lines (See [ICLAC](#) register)

No commonly misidentified line was used.

## ChIP-seq

### Data deposition

Confirm that both raw and final processed data have been deposited in a public database such as [GEO](#).

Confirm that you have deposited or provided access to graph files (e.g. BED files) for the called peaks.

### Data access links

May remain private before publication.

<https://www.ncbi.nlm.nih.gov/geo/query/acc.cgi?acc=GSE178982>

RTCC51A\_S1\_L001\_R1\_001.fastq.bz2  
RTCC51B\_S2\_L001\_R1\_001.fastq.bz2  
RTCC51C\_S3\_L001\_R1\_001.fastq.bz2  
RTCC51D\_S4\_L001\_R1\_001.fastq.bz2  
RTCC51E\_S5\_L001\_R1\_001.fastq.bz2  
RTCC51F\_S6\_L001\_R1\_001.fastq.bz2  
RTCC51G\_S7\_L001\_R1\_001.fastq.bz2  
RTCC51H\_S8\_L001\_R1\_001.fastq.bz2  
RTCC51I\_S9\_L001\_R1\_001.fastq.bz2  
RTCC51J\_S10\_L001\_R1\_001.fastq.bz2  
RTCC51K\_S11\_L001\_R1\_001.fastq.bz2  
RTCC51L\_S12\_L001\_R1\_001.fastq.bz2  
RTCC52A\_S13\_L002\_R1\_001.fastq.bz2  
RTCC52B\_S14\_L002\_R1\_001.fastq.bz2  
RTCC52C\_S15\_L002\_R1\_001.fastq.bz2  
RTCC52D\_S16\_L002\_R1\_001.fastq.bz2  
RTCC52E\_S17\_L002\_R1\_001.fastq.bz2  
RTCC52F\_S18\_L002\_R1\_001.fastq.bz2  
RTCC52G\_S19\_L002\_R1\_001.fastq.bz2  
RTCC52H\_S20\_L002\_R1\_001.fastq.bz2  
RTCC52I\_S21\_L002\_R1\_001.fastq.bz2  
RTCC52J\_S22\_L002\_R1\_001.fastq.bz2  
RTCC52K\_S23\_L002\_R1\_001.fastq.bz2  
RTCC52L\_S24\_L002\_R1\_001.fastq.bz2  
RTCC53A\_S25\_L003\_R1\_001.fastq.bz2  
RTCC53B\_S26\_L003\_R1\_001.fastq.bz2  
RTCC53C\_S27\_L003\_R1\_001.fastq.bz2  
RTCC53D\_S28\_L003\_R1\_001.fastq.bz2  
RTCC53E\_S29\_L003\_R1\_001.fastq.bz2  
RTCC53F\_S30\_L003\_R1\_001.fastq.bz2  
RTCC53G\_S31\_L003\_R1\_001.fastq.bz2  
RTCC53H\_S32\_L003\_R1\_001.fastq.bz2  
RTCC53I\_S33\_L003\_R1\_001.fastq.bz2  
RTCC53J\_S34\_L003\_R1\_001.fastq.bz2  
RTCC53K\_S35\_L003\_R1\_001.fastq.bz2  
RTCC53L\_S36\_L003\_R1\_001.fastq.bz2  
RTCC54A\_S37\_L004\_R1\_001.fastq.bz2  
RTCC54B\_S38\_L004\_R1\_001.fastq.bz2  
RTCC54C\_S39\_L004\_R1\_001.fastq.bz2  
RTCC54D\_S40\_L004\_R1\_001.fastq.bz2  
RTCC54E\_S41\_L004\_R1\_001.fastq.bz2  
RTCC54F\_S42\_L004\_R1\_001.fastq.bz2  
RTCC54G\_S43\_L004\_R1\_001.fastq.bz2  
RTCC54H\_S44\_L004\_R1\_001.fastq.bz2  
RTCC54I\_S45\_L004\_R1\_001.fastq.bz2  
RTCC54J\_S46\_L004\_R1\_001.fastq.bz2  
RTCC54K\_S47\_L004\_R1\_001.fastq.bz2  
RTCC54L\_S48\_L004\_R1\_001.fastq.bz2  
RTCC55A\_S49\_L005\_R1\_001.fastq.bz2  
RTCC55B\_S50\_L005\_R1\_001.fastq.bz2  
RTCC55C\_S51\_L005\_R1\_001.fastq.bz2  
RTCC55D\_S52\_L005\_R1\_001.fastq.bz2  
RTCC55E\_S53\_L005\_R1\_001.fastq.bz2  
RTCC55F\_S54\_L005\_R1\_001.fastq.bz2  
RTCC55G\_S55\_L005\_R1\_001.fastq.bz2  
RTCC55H\_S56\_L005\_R1\_001.fastq.bz2  
RTCC55I\_S57\_L005\_R1\_001.fastq.bz2  
RTCC55J\_S58\_L005\_R1\_001.fastq.bz2  
RTCC55K\_S59\_L005\_R1\_001.fastq.bz2  
RTCC55L\_S60\_L005\_R1\_001.fastq.bz2  
RTCC56A\_S61\_L006\_R1\_001.fastq.bz2  
RTCC56B\_S62\_L006\_R1\_001.fastq.bz2  
RTCC56C\_S63\_L006\_R1\_001.fastq.bz2  
RTCC56D\_S64\_L006\_R1\_001.fastq.bz2  
RTCC56E\_S65\_L006\_R1\_001.fastq.bz2  
RTCC56F\_S66\_L006\_R1\_001.fastq.bz2  
RTCC56G\_S67\_L006\_R1\_001.fastq.bz2  
RTCC56H\_S68\_L006\_R1\_001.fastq.bz2  
RTCC56I\_S69\_L006\_R1\_001.fastq.bz2  
RTCC56J\_S70\_L006\_R1\_001.fastq.bz2  
RTCC56K\_S71\_L006\_R1\_001.fastq.bz2  
RTCC56L\_S72\_L006\_R1\_001.fastq.bz2  
RTCC57A\_S73\_L007\_R1\_001.fastq.bz2  
RTCC57B\_S74\_L007\_R1\_001.fastq.bz2  
RTCC57C\_S75\_L007\_R1\_001.fastq.bz2

RTCC57D\_S76\_L007\_R1\_001.fastq.bz2  
RTCC57E\_S77\_L007\_R1\_001.fastq.bz2  
RTCC57F\_S78\_L007\_R1\_001.fastq.bz2  
RTCC57G\_S79\_L007\_R1\_001.fastq.bz2  
RTCC57H\_S80\_L007\_R1\_001.fastq.bz2  
RTCC57I\_S81\_L007\_R1\_001.fastq.bz2  
RTCC57J\_S82\_L007\_R1\_001.fastq.bz2  
RTCC57K\_S83\_L007\_R1\_001.fastq.bz2  
RTCC57L\_S84\_L007\_R1\_001.fastq.bz2  
RTCC58A\_S85\_L008\_R1\_001.fastq.bz2  
RTCC58B\_S86\_L008\_R1\_001.fastq.bz2  
RTCC58C\_S87\_L008\_R1\_001.fastq.bz2  
RTCC58D\_S88\_L008\_R1\_001.fastq.bz2  
RTCC58E\_S89\_L008\_R1\_001.fastq.bz2  
RTCC58F\_S90\_L008\_R1\_001.fastq.bz2  
RTCC58G\_S91\_L008\_R1\_001.fastq.bz2  
RTCC58H\_S92\_L008\_R1\_001.fastq.bz2  
RTCC58I\_S93\_L008\_R1\_001.fastq.bz2  
RTCC58J\_S94\_L008\_R1\_001.fastq.bz2  
RTCC58K\_S95\_L008\_R1\_001.fastq.bz2  
RTCC58L\_S96\_L008\_R1\_001.fastq.bz2  
RTCC66A\_S39\_L004\_R1\_001.fastq.bz2  
RTCC66E\_S43\_L004\_R1\_001.fastq.bz2  
RTCC66B\_S40\_L004\_R1\_001.fastq.bz2  
RTCC66F\_S44\_L004\_R1\_001.fastq.bz2  
RTCC67A\_S49\_L005\_R1\_001.fastq.bz2  
RTCC67B\_S50\_L005\_R1\_001.fastq.bz2  
RTCC66C\_S41\_L004\_R1\_001.fastq.bz2  
RTCC66G\_S45\_L004\_R1\_001.fastq.bz2  
RTCC66D\_S42\_L004\_R1\_001.fastq.bz2  
RTCC66H\_S46\_L004\_R1\_001.fastq.bz2  
RTCC67C\_S51\_L005\_R1\_001.fastq.bz2  
RTCC67D\_S52\_L005\_R1\_001.fastq.bz2  
CTCF\_degron\_ut\_input\_merged\_coverage.bw  
CTCF\_degron\_ut\_CTCF\_IP\_merged\_coverage.bw  
CTCF\_degron\_ut\_RAD21\_IP\_merged\_coverage.bw  
CTCF\_degron\_ut\_SMC1A\_IP\_merged\_coverage.bw  
CTCF\_degron\_ut\_SMC3\_IP\_merged\_coverage.bw  
CTCF\_degron\_ut\_YY1\_IP\_merged\_coverage.bw  
CTCF\_degron\_auxin\_input\_merged\_coverage.bw  
CTCF\_degron\_auxin\_CTCF\_IP\_merged\_coverage.bw  
CTCF\_degron\_auxin\_RAD21\_IP\_merged\_coverage.bw  
CTCF\_degron\_auxin\_SMC1A\_IP\_merged\_coverage.bw  
CTCF\_degron\_auxin\_SMC3\_IP\_merged\_coverage.bw  
CTCF\_degron\_auxin\_YY1\_IP\_merged\_coverage.bw  
RAD21\_degron\_ut\_input\_merged\_coverage.bw  
RAD21\_degron\_ut\_CTCF\_IP\_merged\_coverage.bw  
RAD21\_degron\_ut\_RAD21\_IP\_merged\_coverage.bw  
RAD21\_degron\_ut\_SMC1A\_IP\_merged\_coverage.bw  
RAD21\_degron\_ut\_SMC3\_IP\_merged\_coverage.bw  
RAD21\_degron\_ut\_YY1\_IP\_merged\_coverage.bw  
RAD21\_degron\_auxin\_input\_merged\_coverage.bw  
RAD21\_degron\_auxin\_CTCF\_IP\_merged\_coverage.bw  
RAD21\_degron\_auxin\_RAD21\_IP\_merged\_coverage.bw  
RAD21\_degron\_auxin\_SMC1A\_IP\_merged\_coverage.bw  
RAD21\_degron\_auxin\_SMC3\_IP\_merged\_coverage.bw  
RAD21\_degron\_auxin\_YY1\_IP\_merged\_coverage.bw  
WAPL\_degron\_ut\_input\_merged\_coverage.bw  
WAPL\_degron\_ut\_CTCF\_IP\_merged\_coverage.bw  
WAPL\_degron\_ut\_RAD21\_IP\_merged\_coverage.bw  
WAPL\_degron\_ut\_SMC1A\_IP\_merged\_coverage.bw  
WAPL\_degron\_ut\_SMC3\_IP\_merged\_coverage.bw  
WAPL\_degron\_ut\_YY1\_IP\_merged\_coverage.bw  
WAPL\_degron\_auxin\_input\_merged\_coverage.bw  
WAPL\_degron\_auxin\_CTCF\_IP\_merged\_coverage.bw  
WAPL\_degron\_auxin\_RAD21\_IP\_merged\_coverage.bw  
WAPL\_degron\_auxin\_SMC1A\_IP\_merged\_coverage.bw  
WAPL\_degron\_auxin\_SMC3\_IP\_merged\_coverage.bw  
WAPL\_degron\_auxin\_YY1\_IP\_merged\_coverage.bw  
YY1\_degron\_ut\_input\_merged\_coverage.bw  
YY1\_degron\_ut\_CTCF\_IP\_merged\_coverage.bw  
YY1\_degron\_ut\_RAD21\_IP\_merged\_coverage.bw  
YY1\_degron\_ut\_SMC1A\_IP\_merged\_coverage.bw  
YY1\_degron\_ut\_SMC3\_IP\_merged\_coverage.bw  
YY1\_degron\_ut\_YY1\_IP\_merged\_coverage.bw  
YY1\_degron\_auxin\_input\_merged\_coverage.bw

```

YY1_degron_auxin_CTCF_IP_merged_coverage.bw
YY1_degron_auxin_RAD21_IP_merged_coverage.bw
YY1_degron_auxin_SMC1A_IP_merged_coverage.bw
YY1_degron_auxin_SMC3_IP_merged_coverage.bw
YY1_degron_auxin_YY1_IP_merged_coverage.bw
YY1_degron_ut_input_rep8_coverage_spikeln.bw
YY1_degron_ut_input_rep9_coverage_spikeln.bw
YY1_degron_ut_RFP_IP_rep8_coverage_spikeln.bw
YY1_degron_ut_RFP_rep9_coverage_spikeln.bw
YY1_degron_ut_YY1_abcam_IP_coverage_spikeln.bw
YY1_degron_ut_YY1_bethyl_IP_coverage_spikeln.bw
YY1_degron_auxin_input_rep8_coverage_spikeln.bw
YY1_degron_auxin_input_rep9_coverage_spikeln.bw
YY1_degron_auxin_RFP_IP_rep8_coverage_spikeln.bw
YY1_degron_auxin_RFP_rep9_coverage_spikeln.bw
YY1_degron_auxin_YY1_abcam_IP_coverage_spikeln.bw
YY1_degron_auxin_YY1_bethyl_IP_coverage_spikeln.bw

```

Genome browser session  
(e.g. [UCSC](#))

no longer applicable

## Methodology

Replicates

We performed Spearman's correlation and Jaccard index to assess the reproducibility between samples. Please see Extended Figure 3a-d for the full result and description.

Sequencing depth

Read length: 51 bp  
Single-end

| File name                         | Replicate                  | Total reads | Uniquely mapped reads |
|-----------------------------------|----------------------------|-------------|-----------------------|
| RTCC51A_S1_L001_R1_001.fastq.bz2  | DCTCF_UT_CTCF_input_Rep1   | 28390977    | 21231461              |
| RTCC51B_S2_L001_R1_001.fastq.bz2  | DCTCF_UT_CTCF_ChIP_Rep1    | 32931783    | 27107390              |
| RTCC51C_S3_L001_R1_001.fastq.bz2  | DCTCF_UT_RAD21_ChIP_Rep1   | 29663143    | 22152005              |
| RTCC51D_S4_L001_R1_001.fastq.bz2  | DCTCF_UT_SMC1A_ChIP_Rep1   | 31920364    | 23816575              |
| RTCC51E_S5_L001_R1_001.fastq.bz2  | DCTCF_UT_SMC3_ChIP_Rep1    | 33634052    | 25358448              |
| RTCC51F_S6_L001_R1_001.fastq.bz2  | DCTCF_UT_YY1_ChIP_Rep1     | 33959459    | 24136167              |
| RTCC51G_S7_L001_R1_001.fastq.bz2  | DCTCF_IAA_YY1_ChIP_Rep1    | 35069865    | 26193557              |
| RTCC51H_S8_L001_R1_001.fastq.bz2  | DCTCF_IAA_CTCF_input_Rep1  | 31335397    | 23944570              |
| RTCC51I_S9_L001_R1_001.fastq.bz2  | DCTCF_IAA_CTCF_ChIP_Rep1   | 29485544    | 21870596              |
| RTCC51J_S10_L001_R1_001.fastq.bz2 | DCTCF_IAA_RAD21_ChIP_Rep1  | 36571058    | 26903685              |
| RTCC51K_S11_L001_R1_001.fastq.bz2 | DCTCF_IAA_SMC1A_ChIP_Rep1  | 34239220    | 25580983              |
| RTCC51L_S12_L001_R1_001.fastq.bz2 | DCTCF_IAA_SMC3_ChIP_Rep1   | 34809582    | 24676494              |
| RTCC52A_S13_L002_R1_001.fastq.bz2 | DRAD21_UT_CTCF_input_Rep1  | 25144424    | 18553371              |
| RTCC52B_S14_L002_R1_001.fastq.bz2 | DRAD21_UT_CTCF_ChIP_Rep1   | 35955736    | 29096124              |
| RTCC52C_S15_L002_R1_001.fastq.bz2 | DRAD21_UT_RAD21_ChIP_Rep1  | 27333608    | 20517789              |
| RTCC52D_S16_L002_R1_001.fastq.bz2 | DRAD21_UT_SMC1A_ChIP_Rep1  | 29481356    | 21800492              |
| RTCC52E_S17_L002_R1_001.fastq.bz2 | DRAD21_UT_SMC3_ChIP_Rep1   | 29484547    | 22039721              |
| RTCC52F_S18_L002_R1_001.fastq.bz2 | DRAD21_UT_YY1_ChIP_Rep1    | 36126503    | 25657564              |
| RTCC52G_S19_L002_R1_001.fastq.bz2 | DRAD21_IAA_YY1_ChIP_Rep1   | 30035710    | 22320231              |
| RTCC52H_S20_L002_R1_001.fastq.bz2 | DRAD21_IAA_CTCF_input_Rep1 | 29583069    | 23915783              |
| RTCC52I_S21_L002_R1_001.fastq.bz2 | DRAD21_IAA_CTCF_ChIP_Rep1  | 40806074    | 30018724              |
| RTCC52J_S22_L002_R1_001.fastq.bz2 | DRAD21_IAA_RAD21_ChIP_Rep1 | 37048981    | 27159280              |
| RTCC52K_S23_L002_R1_001.fastq.bz2 | DRAD21_IAA_SMC1A_ChIP_Rep1 | 32725809    | 24278048              |
| RTCC52L_S24_L002_R1_001.fastq.bz2 | DRAD21_IAA_SMC3_ChIP_Rep1  | 34037754    | 23713201              |
| RTCC53A_S25_L003_R1_001.fastq.bz2 | DWAPL_UT_CTCF_input_Rep1   | 24384191    | 18237846              |
| RTCC53B_S26_L003_R1_001.fastq.bz2 | DWAPL_UT_CTCF_ChIP_Rep1    | 33538857    | 27889963              |
| RTCC53C_S27_L003_R1_001.fastq.bz2 | DWAPL_UT_RAD21_ChIP_Rep1   | 25117348    | 18995694              |
| RTCC53D_S28_L003_R1_001.fastq.bz2 | DWAPL_UT_SMC1A_ChIP_Rep1   | 32636618    | 24552472              |
| RTCC53E_S29_L003_R1_001.fastq.bz2 | DWAPL_UT_SMC3_ChIP_Rep1    | 31072690    | 23659750              |
| RTCC53F_S30_L003_R1_001.fastq.bz2 | DWAPL_UT_YY1_ChIP_Rep1     | 33231275    | 23748753              |
| RTCC53G_S31_L003_R1_001.fastq.bz2 | DWAPL_IAA_YY1_ChIP_Rep1    | 29212730    | 21926504              |
| RTCC53H_S32_L003_R1_001.fastq.bz2 | DWAPL_IAA_CTCF_input_Rep1  | 27408935    | 22403634              |
| RTCC53I_S33_L003_R1_001.fastq.bz2 | DWAPL_IAA_CTCF_ChIP_Rep1   | 24545163    | 18722085              |
| RTCC53J_S34_L003_R1_001.fastq.bz2 | DWAPL_IAA_RAD21_ChIP_Rep1  | 39372702    | 29730206              |
| RTCC53K_S35_L003_R1_001.fastq.bz2 | DWAPL_IAA_SMC1A_ChIP_Rep1  | 33064459    | 25125531              |
| RTCC53L_S36_L003_R1_001.fastq.bz2 | DWAPL_IAA_SMC3_ChIP_Rep1   | 31227728    | 22462804              |
| RTCC54A_S37_L004_R1_001.fastq.bz2 | DYY1_UT_CTCF_input_Rep1    | 26011907    | 20213101              |
| RTCC54B_S38_L004_R1_001.fastq.bz2 | DYY1_UT_CTCF_ChIP_Rep1     | 33422785    | 27745568              |
| RTCC54C_S39_L004_R1_001.fastq.bz2 | DYY1_UT_RAD21_ChIP_Rep1    | 30087634    | 23277925              |
| RTCC54D_S40_L004_R1_001.fastq.bz2 | DYY1_UT_SMC1A_ChIP_Rep1    | 31801107    | 24652683              |
| RTCC54E_S41_L004_R1_001.fastq.bz2 | DYY1_UT_SMC3_ChIP_Rep1     | 38307498    | 30011393              |
| RTCC54F_S42_L004_R1_001.fastq.bz2 | DYY1_UT_YY1_ChIP_Rep1      | 33404639    | 23732272              |
| RTCC54G_S43_L004_R1_001.fastq.bz2 | DYY1_IAA_YY1_ChIP_Rep1     | 32150295    | 25007522              |
| RTCC54H_S44_L004_R1_001.fastq.bz2 | DYY1_IAA_CTCF_input_Rep1   | 30418758    | 25300258              |
| RTCC54I_S45_L004_R1_001.fastq.bz2 | DYY1_IAA_CTCF_ChIP_Rep1    | 29006914    | 22613689              |
| RTCC54J_S46_L004_R1_001.fastq.bz2 | DYY1_IAA_RAD21_ChIP_Rep1   | 36127905    | 28137822              |
| RTCC54K_S47_L004_R1_001.fastq.bz2 | DYY1_IAA_SMC1A_ChIP_Rep1   | 34775334    | 27165767              |

RTCC54L\_S48\_L004\_R1\_001.fastq.bz2 DYY1\_IAA\_SMC3\_ChIP\_Rep1 30250760 22575789  
 RTCC55A\_S49\_L005\_R1\_001.fastq.bz2 DCTCF\_UT\_CTCF\_input\_Rep2 29064053 21308974  
 RTCC55B\_S50\_L005\_R1\_001.fastq.bz2 DCTCF\_UT\_CTCF\_ChIP\_Rep2 28622933 23414213  
 RTCC55C\_S51\_L005\_R1\_001.fastq.bz2 DCTCF\_UT\_RAD21\_ChIP\_Rep2 28352119 20707341  
 RTCC55D\_S52\_L005\_R1\_001.fastq.bz2 DCTCF\_UT\_SMC1A\_ChIP\_Rep2 31567380 22900366  
 RTCC55E\_S53\_L005\_R1\_001.fastq.bz2 DCTCF\_UT\_SMC3\_ChIP\_Rep2 30499910 22361169  
 RTCC55F\_S54\_L005\_R1\_001.fastq.bz2 DCTCF\_UT\_YY1\_ChIP\_Rep2 32034114 22436868  
 RTCC55G\_S55\_L005\_R1\_001.fastq.bz2 DCTCF\_IAA\_YY1\_ChIP\_Rep2 30759222 23115704  
 RTCC55H\_S56\_L005\_R1\_001.fastq.bz2 DCTCF\_IAA\_CTCF\_input\_Rep2 29970750 22561877  
 RTCC55I\_S57\_L005\_R1\_001.fastq.bz2 DCTCF\_IAA\_CTCF\_ChIP\_Rep2 26922404 20134454  
 RTCC55J\_S58\_L005\_R1\_001.fastq.bz2 DCTCF\_IAA\_RAD21\_ChIP\_Rep2 30922446 22614630  
 RTCC55K\_S59\_L005\_R1\_001.fastq.bz2 DCTCF\_IAA\_SMC1A\_ChIP\_Rep2 36670078 27396409  
 RTCC55L\_S60\_L005\_R1\_001.fastq.bz2 DCTCF\_IAA\_SMC3\_ChIP\_Rep2 28327056 20318060  
 RTCC56A\_S61\_L006\_R1\_001.fastq.bz2 DRAD21\_UT\_CTCF\_input\_Rep2 28533417 21316335  
 RTCC56B\_S62\_L006\_R1\_001.fastq.bz2 DRAD21\_UT\_CTCF\_ChIP\_Rep2 39864412 32409731  
 RTCC56C\_S63\_L006\_R1\_001.fastq.bz2 DRAD21\_UT\_RAD21\_ChIP\_Rep2 24040588 18207715  
 RTCC56D\_S64\_L006\_R1\_001.fastq.bz2 DRAD21\_UT\_SMC1A\_ChIP\_Rep2 33326643 24543818  
 RTCC56E\_S65\_L006\_R1\_001.fastq.bz2 DRAD21\_UT\_SMC3\_ChIP\_Rep2 31213208 23450850  
 RTCC56F\_S66\_L006\_R1\_001.fastq.bz2 DRAD21\_UT\_YY1\_ChIP\_Rep2 31832642 22608147  
 RTCC56G\_S67\_L006\_R1\_001.fastq.bz2 DRAD21\_IAA\_YY1\_ChIP\_Rep2 34373025 25342380  
 RTCC56H\_S68\_L006\_R1\_001.fastq.bz2 DRAD21\_IAA\_CTCF\_input\_Rep2 29809808 23571235  
 RTCC56I\_S69\_L006\_R1\_001.fastq.bz2 DRAD21\_IAA\_CTCF\_ChIP\_Rep2 25932689 18848066  
 RTCC56J\_S70\_L006\_R1\_001.fastq.bz2 DRAD21\_IAA\_RAD21\_ChIP\_Rep2 36267390 26475367  
 RTCC56K\_S71\_L006\_R1\_001.fastq.bz2 DRAD21\_IAA\_SMC1A\_ChIP\_Rep2 33420982 24340999  
 RTCC56L\_S72\_L006\_R1\_001.fastq.bz2 DRAD21\_IAA\_SMC3\_ChIP\_Rep2 29109019 20424453  
 RTCC57A\_S73\_L007\_R1\_001.fastq.bz2 DWAPL\_UT\_CTCF\_input\_Rep2 29365053 21832681  
 RTCC57B\_S74\_L007\_R1\_001.fastq.bz2 DWAPL\_UT\_CTCF\_ChIP\_Rep2 31443884 25947147  
 RTCC57C\_S75\_L007\_R1\_001.fastq.bz2 DWAPL\_UT\_RAD21\_ChIP\_Rep2 27448853 20709397  
 RTCC57D\_S76\_L007\_R1\_001.fastq.bz2 DWAPL\_UT\_SMC1A\_ChIP\_Rep2 33625771 24696151  
 RTCC57E\_S77\_L007\_R1\_001.fastq.bz2 DWAPL\_UT\_SMC3\_ChIP\_Rep2 33589486 25104295  
 RTCC57F\_S78\_L007\_R1\_001.fastq.bz2 DWAPL\_UT\_YY1\_ChIP\_Rep2 33367843 23747764  
 RTCC57G\_S79\_L007\_R1\_001.fastq.bz2 DWAPL\_IAA\_YY1\_ChIP\_Rep2 31873279 23709130  
 RTCC57H\_S80\_L007\_R1\_001.fastq.bz2 DWAPL\_IAA\_CTCF\_input\_Rep2 29217470 24308581  
 RTCC57I\_S81\_L007\_R1\_001.fastq.bz2 DWAPL\_IAA\_CTCF\_ChIP\_Rep2 27092281 20386332  
 RTCC57J\_S82\_L007\_R1\_001.fastq.bz2 DWAPL\_IAA\_RAD21\_ChIP\_Rep2 38029125 28068355  
 RTCC57K\_S83\_L007\_R1\_001.fastq.bz2 DWAPL\_IAA\_SMC1A\_ChIP\_Rep2 34460598 25880556  
 RTCC57L\_S84\_L007\_R1\_001.fastq.bz2 DWAPL\_IAA\_SMC3\_ChIP\_Rep2 35324429 25450721  
 RTCC58A\_S85\_L008\_R1\_001.fastq.bz2 DYY1\_UT\_CTCF\_input\_Rep2 29925152 22627993  
 RTCC58B\_S86\_L008\_R1\_001.fastq.bz2 DYY1\_UT\_CTCF\_ChIP\_Rep2 33373385 27186327  
 RTCC58C\_S87\_L008\_R1\_001.fastq.bz2 DYY1\_UT\_RAD21\_ChIP\_Rep2 27369432 20907281  
 RTCC58D\_S88\_L008\_R1\_001.fastq.bz2 DYY1\_UT\_SMC1A\_ChIP\_Rep2 34935069 26316230  
 RTCC58E\_S89\_L008\_R1\_001.fastq.bz2 DYY1\_UT\_SMC3\_ChIP\_Rep2 29912875 22696556  
 RTCC58F\_S90\_L008\_R1\_001.fastq.bz2 DYY1\_UT\_YY1\_ChIP\_Rep2 37055177 26986523  
 RTCC58G\_S91\_L008\_R1\_001.fastq.bz2 DYY1\_IAA\_YY1\_ChIP\_Rep2 34477481 25774376  
 RTCC58H\_S92\_L008\_R1\_001.fastq.bz2 DYY1\_IAA\_CTCF\_input\_Rep2 31577762 25685691  
 RTCC58I\_S93\_L008\_R1\_001.fastq.bz2 DYY1\_IAA\_CTCF\_ChIP\_Rep2 28500684 21247823  
 RTCC58J\_S94\_L008\_R1\_001.fastq.bz2 DYY1\_IAA\_RAD21\_ChIP\_Rep2 38559687 28706476  
 RTCC58K\_S95\_L008\_R1\_001.fastq.bz2 DYY1\_IAA\_SMC1A\_ChIP\_Rep2 34072879 24484758  
 RTCC58L\_S96\_L008\_R1\_001.fastq.bz2 DYY1\_IAA\_SMC3\_ChIP\_Rep2 29588719 21873748  
 RTCC66A\_S39\_L004\_R1\_001.fastq.bz2 DYY1\_UT\_YY1\_input\_Rep3 31927388 21740506  
 RTCC66E\_S43\_L004\_R1\_001.fastq.bz2 DYY1\_UT\_YY1\_input\_Rep4 35563739 23903736  
 RTCC66B\_S40\_L004\_R1\_001.fastq.bz2 DYY1\_UT\_YY1\_ChIP\_anti-RFP\_Rep1 42139234 26749526  
 RTCC66F\_S44\_L004\_R1\_001.fastq.bz2 DYY1\_UT\_YY1\_ChIP\_anti-RFP\_Rep2 38365398 24266302  
 RTCC67A\_S39\_L004\_R1\_001.fastq.bz2 DYY1\_UT\_YY1\_ChIP\_Rep3 23956428 15852867  
 RTCC67B\_S40\_L004\_R1\_001.fastq.bz2 DYY1\_UT\_YY1\_ChIP\_Rep4 31129254 20309199  
 RTCC66C\_S41\_L004\_R1\_001.fastq.bz2 DYY1\_IAA\_YY1\_inplAA\_Rep3 29954279 20441546  
 RTCC66G\_S45\_L004\_R1\_001.fastq.bz2 DYY1\_IAA\_YY1\_inplAA\_Rep4 34928439 23263109  
 RTCC66D\_S42\_L004\_R1\_001.fastq.bz2 DYY1\_IAA\_YY1\_ChIP\_anti-RFP\_Rep1 34351731 22521528  
 RTCC66H\_S46\_L004\_R1\_001.fastq.bz2 DYY1\_IAA\_YY1\_ChIP\_anti-RFP\_Rep2 32396014 21297719  
 RTCC67C\_S41\_L004\_R1\_001.fastq.bz2 DYY1\_IAA\_YY1\_ChIP\_Rep3 25209642 16904397  
 RTCC67D\_S42\_L004\_R1\_001.fastq.bz2 DYY1\_IAA\_YY1\_ChIP\_Rep4 33004641 22032095

## Antibodies

anti-CTCF Abcam ab128873  
 anti-CTCF Abcam ab128873  
 anti-YY1 Abcam ab38422  
 anti-YY1 Abcam ab109237  
 anti-SMC1A Bethyl laboratories A300-055A  
 anti-SMC3 Bethyl laboratories A300-060A

## Peak calling parameters

ChIP-Seq read alignment: Bowtie (-n 2, -m 1)  
 ChIP-Seq peak calling: MACS2 (--nomodel --extsize 300)

## Data quality

Sample\_name Peak\_number\_FDR5% Peak\_number\_5-fold  
 CTCF\_degron\_auxin\_CTCF\_IP 26931 18438  
 CTCF\_degron\_auxin\_Rad21\_IP 14989 1129  
 CTCF\_degron\_auxin\_Smc1a\_IP 39093 3210

CTCF\_degron\_auxin\_Smc3\_IP 15393 777  
 CTCF\_degron\_auxin\_YY1\_IP 56799 16758  
 CTCF\_degron\_ut\_CTCF\_IP 81432 61404  
 CTCF\_degron\_ut\_Rad21\_IP 38762 24735  
 CTCF\_degron\_ut\_Smc1a\_IP 43472 17216  
 CTCF\_degron\_ut\_Smc3\_IP 20194 9213  
 CTCF\_degron\_ut\_YY1\_IP 46354 14594  
 Rad21\_degron\_auxin\_CTCF\_IP 90823 65960  
 Rad21\_degron\_auxin\_Rad21\_IP 11347 2803  
 Rad21\_degron\_auxin\_Smc1a\_IP 9511 762  
 Rad21\_degron\_auxin\_Smc3\_IP 5464 502  
 Rad21\_degron\_auxin\_YY1\_IP 42273 12447  
 Rad21\_degron\_ut\_CTCF\_IP 95139 72386  
 Rad21\_degron\_ut\_Rad21\_IP 43113 28993  
 Rad21\_degron\_ut\_Smc1a\_IP 41091 15957  
 Rad21\_degron\_ut\_Smc3\_IP 38509 21803  
 Rad21\_degron\_ut\_YY1\_IP 48329 16732  
 WAPL\_degron\_auxin\_CTCF\_IP 97574 74792  
 WAPL\_degron\_auxin\_Rad21\_IP 49451 33319  
 WAPL\_degron\_auxin\_Smc1a\_IP 38650 17317  
 WAPL\_degron\_auxin\_Smc3\_IP 45257 26165  
 WAPL\_degron\_auxin\_YY1\_IP 40640 12558  
 WAPL\_degron\_ut\_CTCF\_IP 98200 75332  
 WAPL\_degron\_ut\_Rad21\_IP 43445 29722  
 WAPL\_degron\_ut\_Smc1a\_IP 51296 21539  
 WAPL\_degron\_ut\_Smc3\_IP 36245 20304  
 WAPL\_degron\_ut\_YY1\_IP 40093 13294  
 YY1\_degron\_auxin\_CTCF\_IP 101925 75420  
 YY1\_degron\_auxin\_Rad21\_IP 45114 29887  
 YY1\_degron\_auxin\_Smc1a\_IP 47950 20330  
 YY1\_degron\_auxin\_Smc3\_IP 47098 25773  
 YY1\_degron\_auxin\_YY1\_IP 14627 3756  
 YY1\_degron\_ut\_CTCF\_IP 98775 74506  
 YY1\_degron\_ut\_Rad21\_IP 48854 32391  
 YY1\_degron\_ut\_Smc1a\_IP 51886 24617  
 YY1\_degron\_ut\_Smc3\_IP 46209 28173  
 YY1\_degron\_ut\_YY1\_IP 32203 10210

Software

Bowtie2 (v 2.3.5.1), samtools (v 1.9), deepTools (v 3.5.0), MASC2 (v 2.2.6), MAnorm2 (v 1.0),

## Flow Cytometry

### Plots

Confirm that:

- The axis labels state the marker and fluorochrome used (e.g. CD4-FITC).
- The axis scales are clearly visible. Include numbers along axes only for bottom left plot of group (a 'group' is an analysis of identical markers).
- All plots are contour plots with outliers or pseudocolor plots.
- A numerical value for number of cells or percentage (with statistics) is provided.

### Methodology

Sample preparation

We measured RFP (mScarlet1) intensity for checking YY1 degradation efficiency. YY1-minilAA7 cells (clone YD39) were treated with 500  $\mu$ M IAA for time points at 0, 1, 2, 3 hr. Ethanol-treated cells (negative control) were processed with the same procedure.

Instrument

BD Bioscience LSR Fortessa

Software

FlowJo (v10.3), FlowJo LL

Cell population abundance

Cells were detached and dissociated into single cells by trypsin, washed once by culture media, and resuspended into 1 mL of culture media. We typically have >95% of viable cells.

Gating strategy

We gated the main population on the FSC/SSC plot by excluding the apparent populations of cell debris and cell doublets. For RFP (mScarlet1) gating, we defined ~99.5% of cells in the untreated cell as RFP-positive cells.

- Tick this box to confirm that a figure exemplifying the gating strategy is provided in the Supplementary Information.
