# Supplementary material for: Enhancer–promoter interactions and transcription are largely maintained upon acute loss of CTCF, cohesin, WAPL or YY1
Source: PubMed Central journal article supplement (PMC9729117; doi:10.1038/s41588-022-01223-8), 2022-12-05

Anti-YY1

WT  
AtAtB2    Y016    Y039  
0 1 3    0 1 3    0 1 3

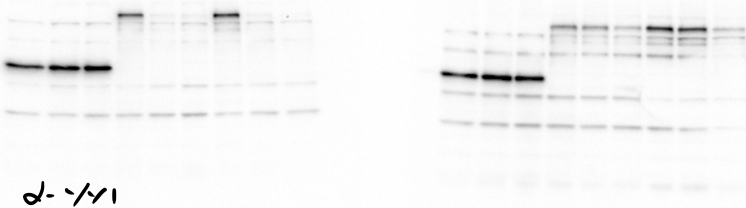

Anti-RFP

WT  
AtAtB2    Y016    Y039  
0 1 3    0 1 3    0 1 3

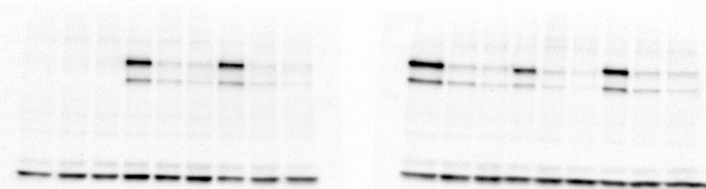

Anti-ACTB

WT  
-AtAtB2    Y016    Y039  
0 1 3    0 1 3    6 1 3

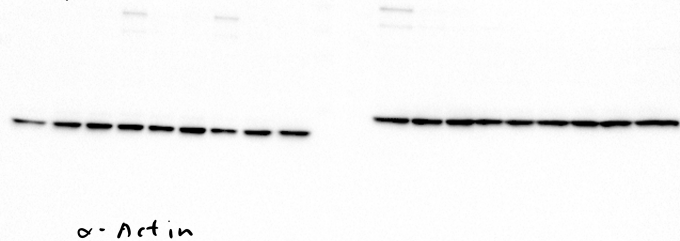

Supplement: 41588_2022_1223_MOESM9_ESM.pdf [file 41588_2022_1223_MOESM9_ESM.pdf]
