# Supplementary material for: Enhancer–promoter interactions and transcription are largely maintained upon acute loss of CTCF, cohesin, WAPL or YY1
Source: PubMed Central journal article supplement (PMC9729117; doi:10.1038/s41588-022-01223-8), 2022-12-05

Anti-CTCF and anti-RAD21

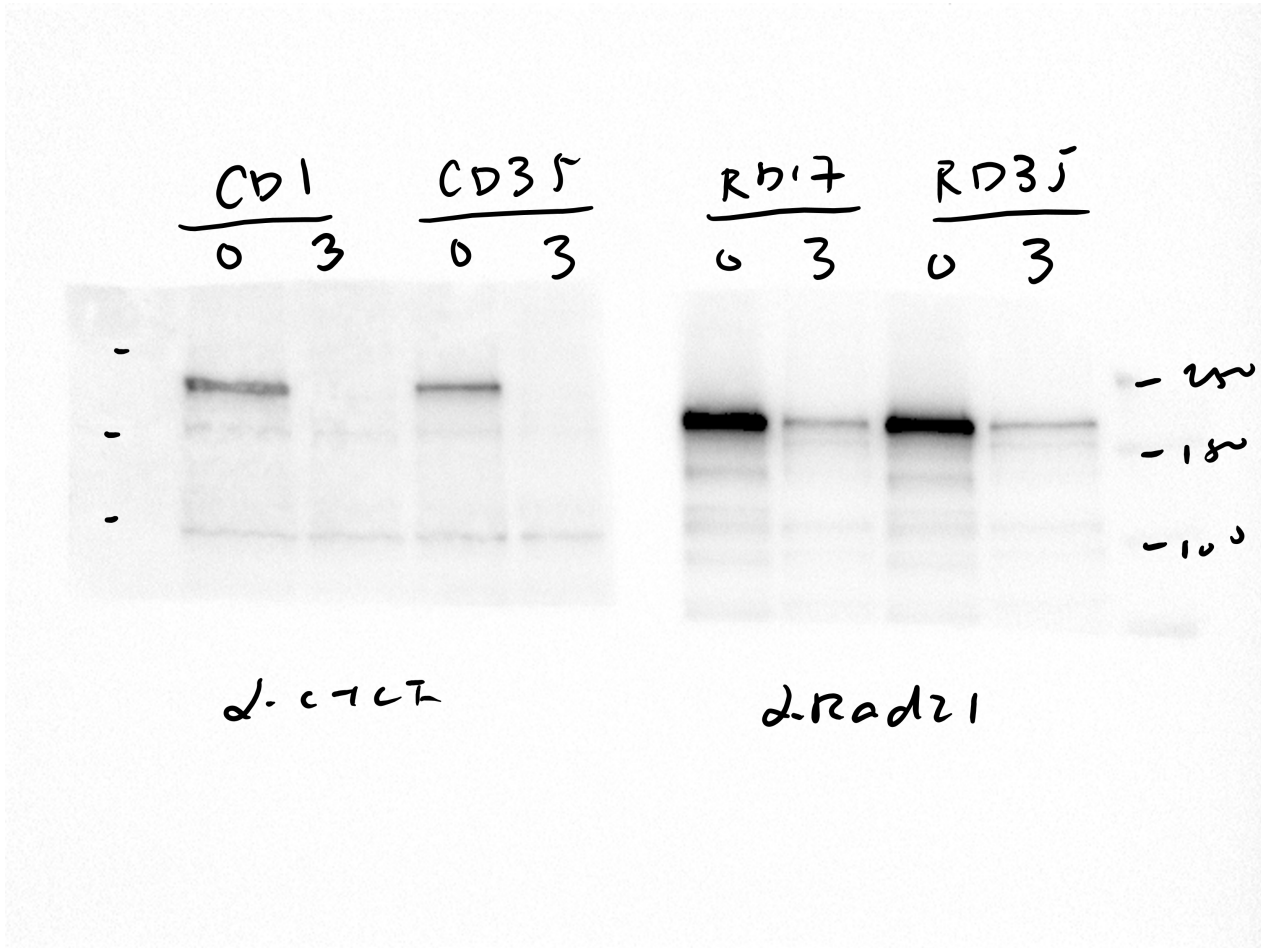

Anti-ACTB

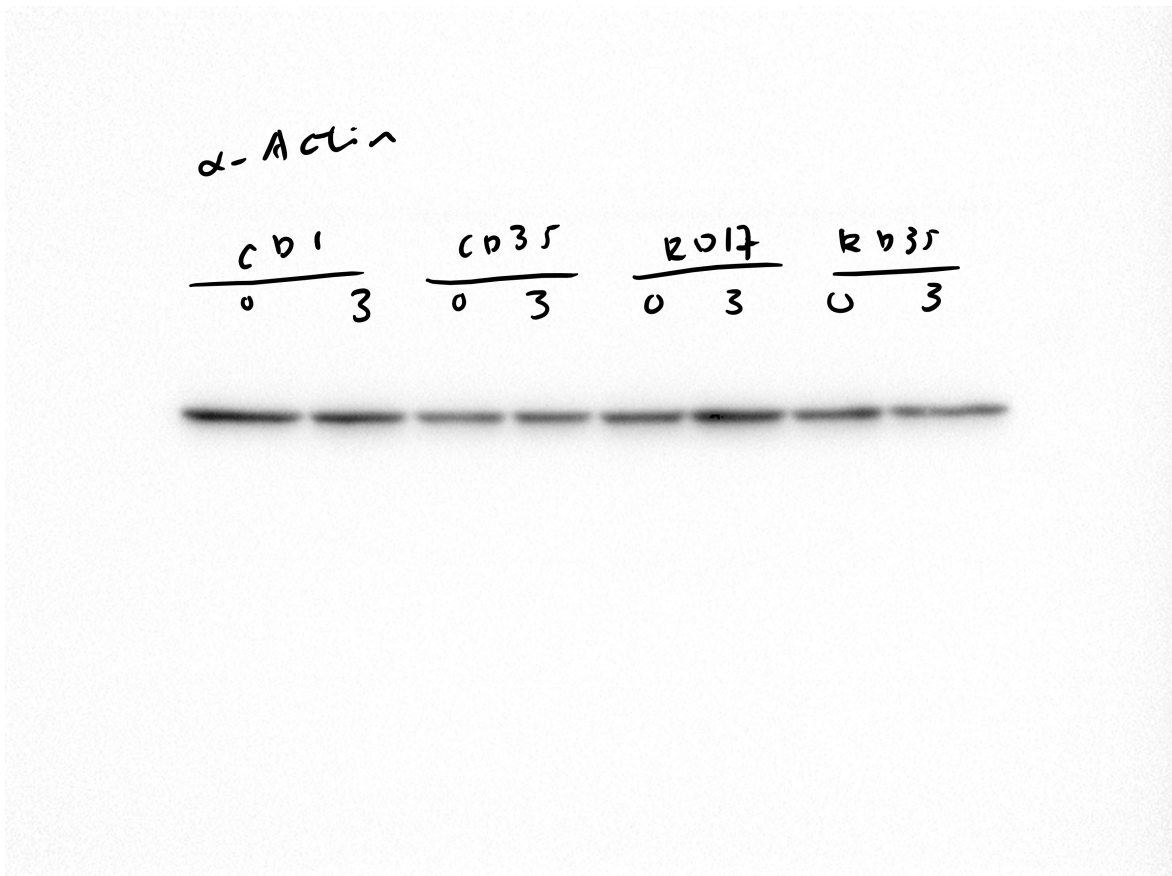

Supplement: 41588_2022_1223_MOESM11_ESM.pdf [file 41588_2022_1223_MOESM11_ESM.pdf]
